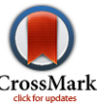

## Opinion

# Early Mortality Syndrome Outbreaks: A Microbial Management Issue in Shrimp Farming?

Peter De Schryver\*, Tom Defoirdt, Patrick Sorgeloos

Laboratory of Aquaculture & Artemia Reference Center, Department of Animal Production, Ghent University, Gent, Belgium

A recent disease of farmed Penaeid shrimp, commonly referred to as “early mortality syndrome” (EMS) or more technically known as “acute hepatopancreatic necrosis disease” (AHPND), was first reported in southern China in 2010 and subsequently in Vietnam, Thailand, and Malaysia [1]. The EMS/AHPND disease typically affects shrimp postlarvae within 20–30 days after stocking and frequently causes up to 100% mortality. The Global Aquaculture Alliance [2] has estimated that losses to the Asian shrimp culture sector amount to USD 1 billion. The causative agent of EMS/AHPND has been reported to be a bacterium—more specifically a pathogenic *Vibrio* belonging to the Harveyi clade, presumably *Vibrio parahaemolyticus* [3]. So far, this has been the only description of a bacterial isolate capable of causing EMS/AHPND. Strategies to remedy this disease are urgently needed. However, as long as it remains unclear whether or not all incidences of EMS/AHPND are caused by one or more specific *V. parahaemolyticus* strains, approaches that focus on controlling the presence or activity of vibrios in general have the highest chance of decreasing the risk of EMS/AHPND outbreaks.

We argue that the proposed strategy of total disinfection of pond bottom and water to kill possible vectors of EMS/AHPND [1] may contribute to the epidemic spread of the EMS/AHPND disease rather than control it, and that microbial management strategies may be the key to minimizing the risk of EMS/AHPND outbreaks. We suggest stocking shrimp postlarvae in systems with a mature microbiota (such as algae-rich greenwaters and microbially matured water systems), as environments primarily colonized by slow-growing harmless bacteria might best guarantee the prevention of EMS/AHPND outbreaks.

The ecosystem disturbance caused by the current practice of disinfecting ponds to remove potential pathogens or their carriers prior to stocking shrimp postlarvae most probably does more harm than good. The increase in nutrient availability after disinfection combined with a destabilized

and impoverished microbial community (and a consequent lack of competition) favors fast-growing bacteria (such as many pathogenic *Vibrio* spp.) in recolonizing the environment [4]. Considering that EMS/AHPND most probably is caused by a *Vibrio*, this practice is thus more likely to stimulate proliferation of the EMS/AHPND-causing agent in the pond than counteract it. In fact, important lessons can be learned from the outbreaks of luminescent vibriosis in the early 1990s. This disease was caused by *Vibrio harveyi* and closely related species—all belonging to the Harveyi clade of vibrios (and therefore closely related to the causative agent of EMS/AHPND) [5]. Luminescent vibriosis occurred during the first 10–45 days after stocking of shrimp postlarvae in the grow-out ponds. The outbreak of the disease was found to be preceded by a substantial increase in the number of opportunistic vibrios in the pond water [6], and this increase followed pond disinfection and was associated with a perturbed microbial community in combination with the presence of nutrients [6,7].

In the last year, several remedies to control EMS/AHPND—mostly based on empirical observations—have been proposed on public discussion lists. It was for example stated that EMS/AHPND is less prevalent in ponds colonized by copepods (small crustaceans used as live feed for the larvae of aquaculture animals). Copepod presence is an indicator of a naturally mature/stable ecosystem, as it requires constant amounts of phytoplankton and bacteria as feed [8]. Alternatively, using greenwater technology has also been

related with a lowered incidence of EMS/AHPND in practice. Greenwater systems (in contrast to clear water systems) are characterized by a mature micro-algal and bacterial community and have been shown before to result in decreased *Vibrio* levels and decreased animal mortality [9,10]. Several mechanisms have been linked to the beneficial effect of greenwaters, including the algal production of antibacterial substances [11] and compounds that inhibit virulence gene regulation (e.g., quorum sensing inhibitors [12]). However, we think that the bacteria that are associated with the micro-algae should not be neglected either, as they might be able to compete with pathogens for available nutrients and to produce compounds affecting viability and/or activity of pathogens [13].

Similar to greenwater technology, microbially matured water systems have been developed to minimize the presence of pathogens that are able to grow fast and are consequently capable of quickly invading “empty” niches. The microbial maturity of water can be described based on the ecological theory of  $r/K$  selection [14]. Microbially matured water is characterized by a dominance of slow-growing bacteria with a limited nutrient supply per bacterium, the so-called  $K$  strategists. They eliminate the niches for fast growing bacteria, the  $r$  strategists, which include many disease-causing *Vibrio* spp. [4]. As such,  $K$  selective pressure in shrimp postlarvae culture systems may avoid proliferation of the vibrios causing EMS/AHPND.  $K$  selective pressure in grow-out ponds can be achieved by minimizing

**Citation:** De Schryver P, Defoirdt T, Sorgeloos P (2014) Early Mortality Syndrome Outbreaks: A Microbial Management Issue in Shrimp Farming? PLoS Pathog 10(4): e1003919. doi:10.1371/journal.ppat.1003919

**Editor:** Glenn F. Rall, The Fox Chase Cancer Center, United States of America

**Published:** April 24, 2014

**Copyright:** © 2014 De Schryver et al. This is an open-access article distributed under the terms of the Creative Commons Attribution License, which permits unrestricted use, distribution, and reproduction in any medium, provided the original author and source are credited.

**Funding:** PDS and TD are supported as post-doctoral fellows by the Fund for Scientific Research (FWO) in Flanders (Belgium) (www.fwo.be). The funders had no role in study design, data collection and analysis, decision to publish, or preparation of the manuscript.

**Competing Interests:** The authors have declared that no competing interests exist.

\* E-mail: Peter.Deschryver@Ugent.be

### Box 1. EMS/AHPND Mitigation Strategies Should Be Compatible with Microbially Mature Ecosystems

The use of antibiotics and/or disinfectants would not only destroy microbially mature systems, it has also proven ineffective in treating diseases caused by luminescent vibrios (i.e., *V. harveyi* and closely related bacteria, which are closely related to the bacteria causing EMS/AHPND), and alternative methods have been proposed in this context [5]. Antivirulence therapy, i.e., disarming the pathogens (by affecting the expression of virulence genes) rather than killing them, could be a promising approach in this respect. Interestingly, we recently reported that the use of compounds that inhibit quorum sensing (bacterial cell-to-cell communication regulating the expression of virulence factors) significantly decreased the mortality of giant river prawn larvae caused by pathogenic *V. harveyi* [16]. Alternatively, biological agents that are only active at the site of infection (i.e., the gut) could be applied. Poly- $\beta$ -hydroxybutyrate is an example of a natural compound that upon depolymerisation interferes with the energy metabolism of pathogenic cells, and it has been shown to control *Vibrio* presence in the gut of giant river prawn larvae [17]. However, unfortunately, these kinds of therapies are still in the research phase.

disturbances leading to sudden variations in nutrient levels in the rearing water during shrimp culture in order to keep nutrient supply per bacterium constant and low, and by colonizing the influent water with nonpathogenic bacteria and/or algae at a carrying capacity close to that of

the rearing water [15]. In case pond disinfection is applied as a hygienic barrier, maturation of the pond water after flooding should be ensured prior to stocking, in order to prevent *r* strategists from dominating the system.

It needs to be stressed that the mature ecosystem approach aims at preventing EMS/AHPND and will not act as a curative treatment for EMS/AHPND-infected shrimp. In order to cure affected animals, one should develop and apply techniques that result in minimal disturbances of the nontarget microbiota in order to be compatible with microbially mature systems (Box 1). Finally, one should make sure that the larvae used for stocking are EMS/AHPND-free (e.g., by applying microbial management practices in hatcheries as well).

In conclusion, the recent outbreaks of EMS/AHPND suggest that modern intensive shrimp farming practices need to be critically reviewed. We argue that microbial management practices (including growing animals in microbially mature ecosystems and applying biocontrol strategies that are compatible with these systems) are currently largely neglected, even though they are a key factor in solving these problems.

### References

1. FAO (2013) Report of the FAO/MARD Technical Workshop on Early Mortality Syndrome (EMS) or Acute Hepatopancreatic Necrosis Syndrome (AHPND) of Cultured Shrimp (under TCP/VIE/3304). Hanoi, Viet Nam, 25–27 June 2013. FAO Fisheries and Aquaculture Report No. 1053. Rome. 54 pp.
2. GAA (May 2013) Cause of EMS shrimp disease identified. GAA News Releases. Available: <http://www.gaalliance.org/newsroom>. Accessed 29 March 2014.
3. Tran L, Nunan L, Redman RM, Mohny LL, Pantoja CR, et al. (2013) Determination of the infectious nature of the agent of acute hepatopancreatic necrosis syndrome affecting penaeid shrimp. *Dis Aquat Organ* 105: 45–55.
4. Attramadal KJK, Salvesen I, Xue RY, Øie G, Storseth TR, et al. (2012) Recirculation as a possible microbial control strategy in the production of marine larvae. *Aquac Eng* 46: 27–39.
5. Defoirdt T, Boon N, Sorgeloos P, Verstraete W, Bossier P (2007) Alternatives to antibiotics to control bacterial infections: luminescent vibriosis in aquaculture as an example. *Trends Biotechnol* 25: 472–479.
6. Lavilla-Pitogo CR, Leño EM, Paner MG (1998) Mortalities of pond-cultured juvenile shrimp, *Penaeus monodon*, associated with dominance of luminescent vibrios in the rearing environment. *Aquaculture* 164: 337–349.
7. Bratvold D, Lu J, Browdy CL (1999) Disinfection, microbial community establishment and shrimp production in a prototype biosecure pond. *J World Aquac Soc* 30: 422–432.
8. Støttrup JG (2003) Production and nutritional value of copepods. In: Støttrup JG, McEvoy LA, editors. *Live feeds in marine aquaculture*. Oxford: Blackwell Science Ltd. pp. 145–205.
9. Lio-Po GD, Leano EM, Penaranda MD, Villa-Franco AU, Sombito CD, Guanzon NG Jr (2005) Anti-luminescent *Vibrio* factors associated with the green water grow-out culture of the tiger shrimp *Penaeus monodon*. *Aquaculture* 250: 1–7.
10. Tendencia EA, Dela Peña MR (2010) Effect of different sizes of saline red tilapia hybrid *Oreochromis niloticus* x *O. mossambicus* on the growth of luminous bacteria *Vibrio harveyi*. *Philipp Agric Sci* 93: 463–467.
11. Kokou F, Makridis P, Kentouri M, Divanach P (2012) Antibacterial activity in microalgae cultures. *Aquac Res* 43: 1520–1527.
12. Natrah FMI, Kenmegne MM, Wiyoto W, Sorgeloos P, Bossier P, et al. (2011) Effects of micro-algae commonly used in aquaculture on acyl-homoserine lactone quorum sensing. *Aquaculture* 317: 53–57.
13. Natrah FMI, Bossier P, Sorgeloos P, Yusoff FM, Defoirdt T (2014) Significance of microalgal-bacterial interactions for aquaculture. *Reviews in Aquaculture* 6: 48–61.
14. MacArthur RH, Wilson EO (1967) *The theory of island biogeography*. Princeton: Princeton University Press. 205 p.
15. Skjermo J, Salvesen I, Øie G, Olsen Y, Vadstein O (1997) Microbially matured water: a technique for selection of a non-opportunistic bacterial flora in water that may improve performance of marine larvae. *Aquac Int* 5: 13–28.
16. Pande GSJ, Scheie AA, Benneche T, Wille M, Sorgeloos P, et al. (2012) Quorum sensing-disrupting compounds protect larvae of the giant freshwater prawn *Macrobrachium rosenbergii* from *Vibrio harveyi* infection. *Aquaculture* 406: 121–124.
17. Nhan DT, Wille M, De Schryver P, Defoirdt T, Bossier P, et al. (2010) The effect of poly- $\beta$ -hydroxybutyrate on larviculture of the giant freshwater prawn *Macrobrachium rosenbergii*. *Aquaculture* 302: 76–81.
